# Supplementary material for: Effectiveness of the 23-valent pneumococcal polysaccharide vaccine against vaccine serotype pneumococcal pneumonia in adults: A case-control test-negative design study
Source: PLoS Med. 2020 Oct 23;17(10):e1003326. doi: 10.1371/journal.pmed.1003326 (PMC7584218; doi:10.1371/journal.pmed.1003326)
Supplement: S1 Text — STROBE, Strengthening the Reporting of Observational Studies in Epidemiology. (DOC) [file pmed.1003326.s001.doc]

STROBE Statement—Checklist of items that should be included in reports of ***case-control studies***

|  | Item No | Recommendation | Page No |
| --- | --- | --- | --- |
| **Title and abstract** | 1 | (*a*) Indicate the study’s design with a commonly used term in the title or the abstract | Title  Abstract |
| (*b*) Provide in the abstract an informative and balanced summary of what was done and what was found | Abstract |
| Introduction | | | |
| Background/rationale | 2 | Explain the scientific background and rationale for the investigation being reported | Introduction paragraphs 1-2 |
| Objectives | 3 | State specific objectives, including any prespecified hypotheses | Introduction, Aim, para 1, |
| Methods | | | |
| Study design | 4 | Present key elements of study design early in the paper | Methods, study design, para 1 |
| Setting | 5 | Describe the setting, locations, and relevant dates, including periods of recruitment, exposure, follow-up, and data collection | Methods, study design, para 1 |
| Participants | 6 | (*a*) Give the eligibility criteria, and the sources and methods of case ascertainment and control selection. Give the rationale for the choice of cases and controls | Methods, Study Cohort, para 1 |
| (*b*)For matched studies, give matching criteria and the number of controls per case | NA |
| Variables | 7 | Clearly define all outcomes, exposures, predictors, potential confounders, and effect modifiers. Give diagnostic criteria, if applicable | Methods, sections case group, control group, vaccine status |
| Data sources/ measurement | 8* | For each variable of interest, give sources of data and details of methods of assessment (measurement). Describe comparability of assessment methods if there is more than one group | Methods, Vaccine status, para 1 |
| Bias | 9 | Describe any efforts to address potential sources of bias | Methods, statistical analysis, para 1 |
| Study size | 10 | Explain how the study size was arrived at | NA |
| Quantitative variables | 11 | Explain how quantitative variables were handled in the analyses. If applicable, describe which groupings were chosen and why | Methods, statistical analysis, para 1 |
| Statistical methods | 12 | (*a*) Describe all statistical methods, including those used to control for confounding | Methods, statistical analysis, para 1 & 2 |
| (*b*) Describe any methods used to examine subgroups and interactions | Methods, statistical analysis, para 2 |
| (*c*) Explain how missing data were addressed | Methods, statistical analysis, para 1 |
| (*d*) If applicable, explain how matching of cases and controls was addressed | NA |
| (*e*) Describe any sensitivity analyses | Methods, Vaccine status, para 1  Methods, Statistical Analysis, para 1 |
| Results | | | |
| Participants | 13* | (a) Report numbers of individuals at each stage of study—eg numbers potentially eligible, examined for eligibility, confirmed eligible, included in the study, completing follow-up, and analysed | Results, cohort description, para 1 |
| (b) Give reasons for non-participation at each stage | Results, cohort description, para 1 |
| (c) Consider use of a flow diagram | NA |
| Descriptive data | 14* | (a) Give characteristics of study participants (eg demographic, clinical, social) and information on exposures and potential confounders | Results, sections: comparison of cases and controls, para 1  Page 13, Table 1 |
| (b) Indicate number of participants with missing data for each variable of interest | Results, cohort description, para 1  Page 13, Table 1  Page 16, Results, Time from vaccination, para 1 |
| Outcome data | 15* | Report numbers in each exposure category, or summary measures of exposure | Results, Primary Analysis, para 1  Page 14, Table 2 |

| Main results | | 16 | (*a*) Give unadjusted estimates and, if applicable, confounder-adjusted estimates and their precision (eg, 95% confidence interval). Make clear which confounders were adjusted for and why they were included | Results, Sections: Primary analysis & secondary analysis  Table 2 |
| --- | --- | --- | --- | --- |
| (*b*) Report category boundaries when continuous variables were categorized | Methods, statistical analysis, para 3  Results, Table 3 |
| (*c*) If relevant, consider translating estimates of relative risk into absolute risk for a meaningful time period | NA |
| Other analyses | 17 | Report other analyses done—eg analyses of subgroups and interactions, and sensitivity analyses | | Results, Sections: Primary analysis & secondary analysis  Table 2  Results, Sensitivity analysis  Results, Time from vaccination  Results, Table 3  Supplementary tables 3, 5 and 6 |
| Discussion | | | | |
| Key results | 18 | Summarise key results with reference to study objectives | | Discussion, para 1 |
| Limitations | 19 | Discuss limitations of the study, taking into account sources of potential bias or imprecision. Discuss both direction and magnitude of any potential bias | | Discussion, strengths and limitations, para 2 |
| Interpretation | 20 | Give a cautious overall interpretation of results considering objectives, limitations, multiplicity of analyses, results from similar studies, and other relevant evidence | | Discussion, paragraphs 2-7 |
| Generalisability | 21 | Discuss the generalisability (external validity) of the study results | | Discussion, Implications, para 1 |
| Other information | | | | |
| Funding | 22 | Give the source of funding and the role of the funders for the present study and, if applicable, for the original study on which the present article is based | | Please see funding statement via online submission |

*Give information separately for cases and controls.

**Note:** An Explanation and Elaboration article discusses each checklist item and gives methodological background and published examples of transparent reporting. The STROBE checklist is best used in conjunction with this article (freely available on the Web sites of PLoS Medicine at http://www.plosmedicine.org/, Annals of Internal Medicine at http://www.annals.org/, and Epidemiology at http://www.epidem.com/). Information on the STROBE Initiative is available at http://www.strobe-statement.org.
